# Supplementary material for: Mass cytometry reveals innate lymphoid cell differentiation pathways in the human fetal intestine
Source: PubMed Central journal article supplement — J Exp Med. 2018 May 7;215(5):1383–96. doi: 10.1084/jem.20171934 (PMC5940268; doi:10.1084/jem.20171934), 2018-05-07
Supplement: JEM_20171934_sm.pdf [file JEM_20171934_sm.pdf]

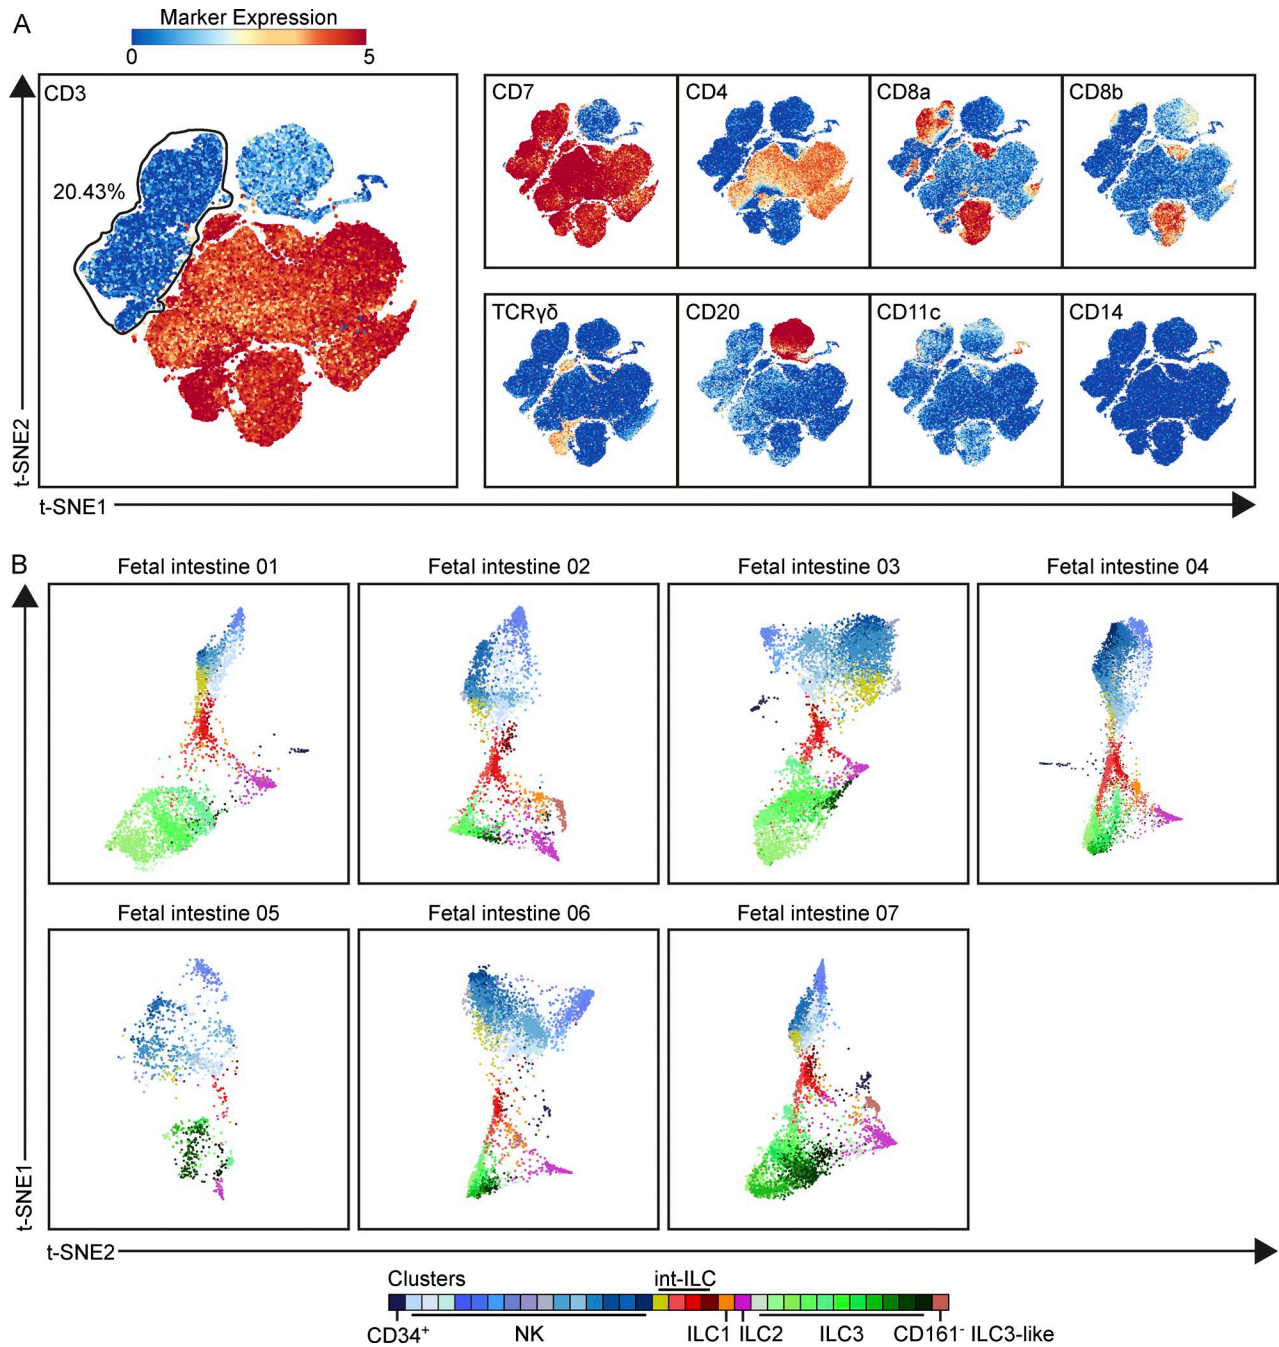

Figure S2. **t-SNE-based analysis of the Lin<sup>-</sup>CD7<sup>+</sup> innate immune compartment in the human fetal intestine.** (A) Gating strategy of the Lin<sup>-</sup>CD7<sup>+</sup> innate cell population in the human fetal intestine. t-SNE embeddings of the collective CD45<sup>+</sup> cells ( $2.2 \times 10^5$  cells) from seven fetal intestines at single-cell resolution. Colors of cells represent ArcSinh5-transformed expression values of indicated markers. (B) Monitoring t-SNE computation dynamics for each individual fetal intestine. t-SNE embeddings of the ILC mass cytometry data showing single cells at stage 4 of the optimization course of the t-SNE computation for each individual fetal intestine ( $n = 7$ ). Colors represent the cluster partitions.

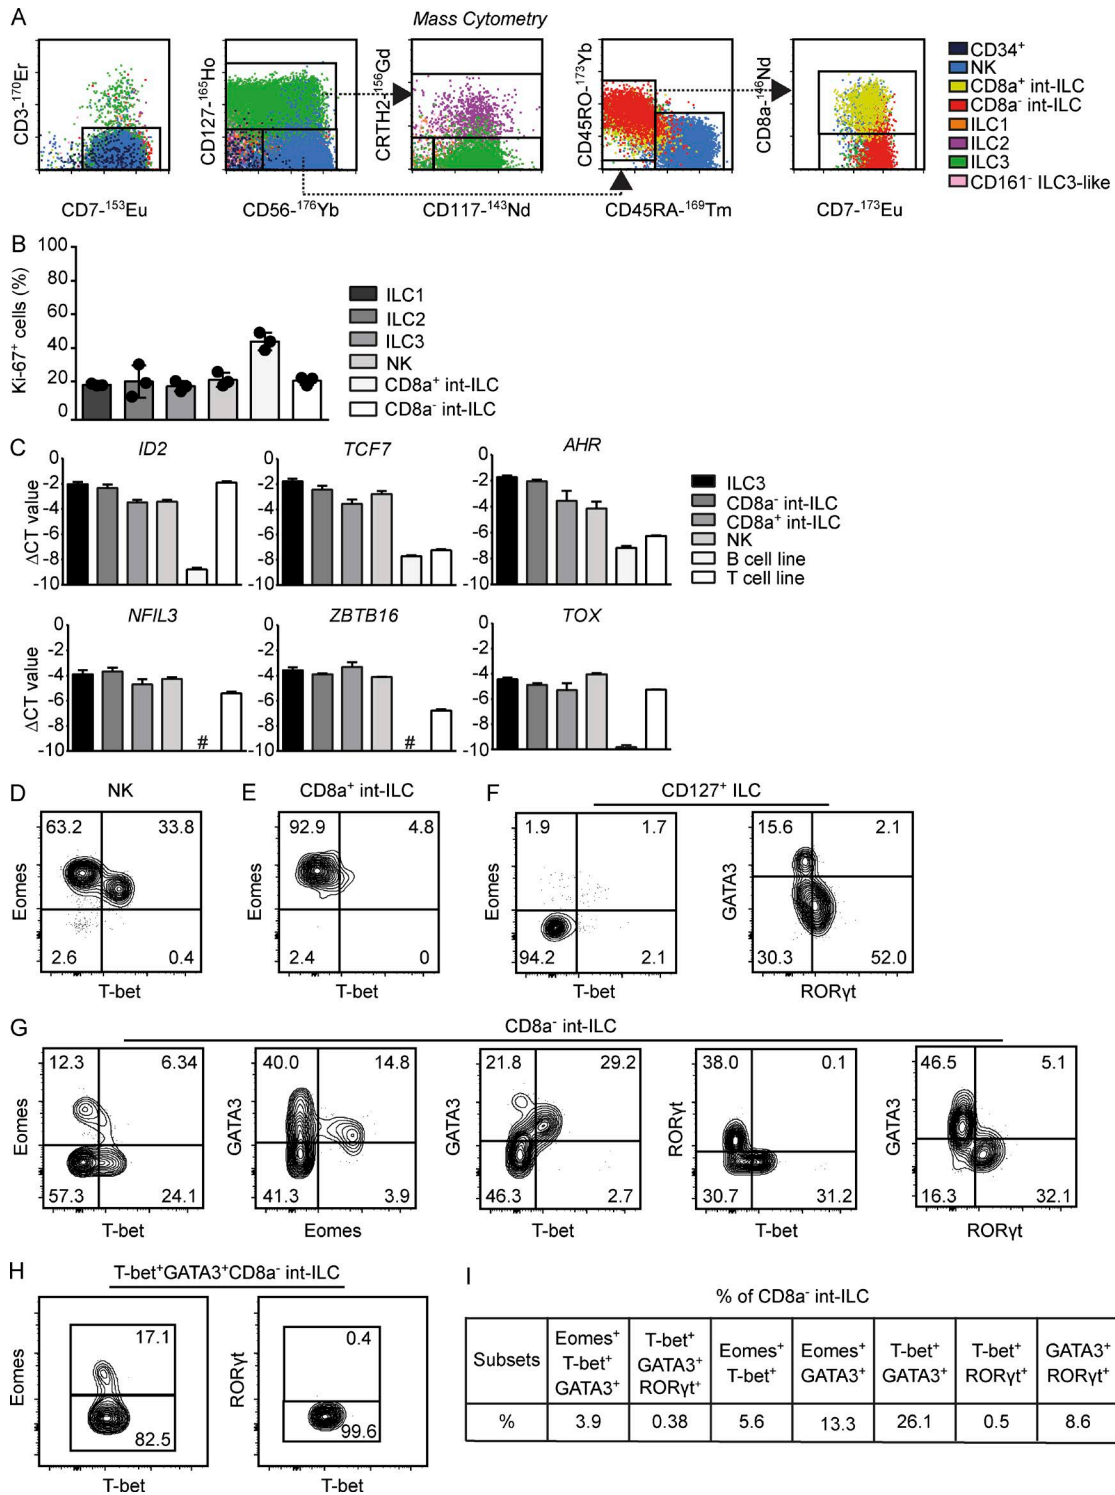

**Figure S3. Ki-67 and transcription factor expression profiles of fetal intestinal ILCs ex vivo.** (A) Minimal antibody panel required for phenotyping ILC and int-ILC subsets in the human fetal intestine. Biaxial plots showing the expression of the indicated markers by ILC1, ILC2, ILC3, NK, and int-ILC subsets based on mass cytometry data derived from seven human fetal intestines. Color represents the different subsets identified by the t-SNE-based analysis shown in Fig. 1 B, and numbers of x-axis and y-axis represent ArcSinh5-transformed expression values of indicated markers. (B) Quantification of Ki-67-positive cells within indicated subsets obtained from three different human fetal intestines (two independent experiments). Error bar shows mean  $\pm$  SD. (C) Relative mRNA expression of *ID2*, *TCF7*, *AHR*, *NFIL3*, *ZBTB16*, and *TOX* by the purified ILC subsets. B- and T-cell lines analyzed by real-time PCR (three independent experiments). *GAPDH* as reference gene. #, The  $\Delta$ CT value is below -10. Error bar shows mean  $\pm$  SD. (D) Representative biaxial plots showing the expression of T-bet and Eomes, and GATA3 and RORyt by fetal intestinal CD127+ ILC. (E and F) Representative biaxial plots showing the expression of T-bet and Eomes by (E) fetal intestinal NK cells, and (F) CD8a+ int-ILC as defined in Fig. 3 A with flow cytometry. (G) Representative biaxial plots showing the combinatorial expression profiles of Eomes, T-bet, GATA3, and RORyt by fetal intestinal CD8a- int-ILC. (H) Expression of Eomes and RORyt by fetal intestinal T-bet+GATA3+CD8a- int-ILC. (I) Quantification of transcription factor positive cells of fetal intestinal CD8a- int-ILC (two independent experiments).



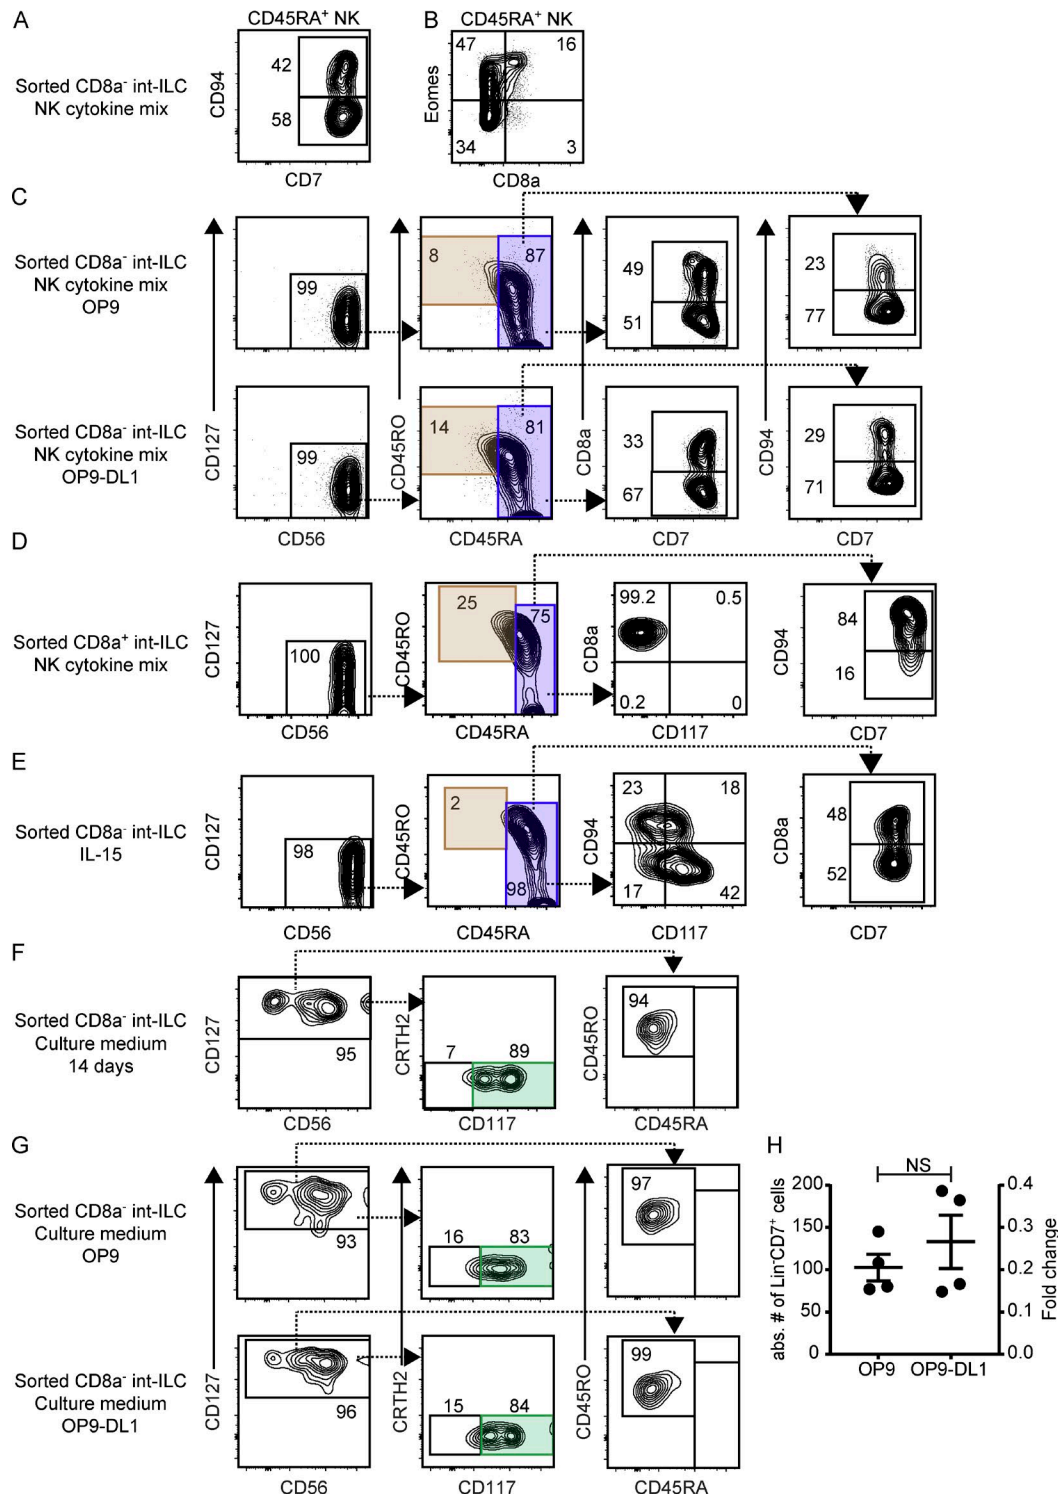

Figure S4. **CD8a<sup>-</sup> int-ILC can differentiate into CD45RA<sup>+</sup> NK cells and ILC3.** (A–E) Purified CD8a<sup>-</sup> int-ILC (500 cells/well) and CD8a<sup>+</sup> int-ILC (100 cells/well) populations were cocultured with irradiated OP9-DL1 or OP9 stromal cells for 7 d either with culture medium supplemented with either NK cytokine mix or IL-15. Generated cells were harvested and analyzed by flow cytometry. Duplicated wells were included for each condition in each experiment. Representative plots show a single duplicate. Biaxial plots show the expression of CD94 (A) and the transcription factor Eomes (B) by generated CD45RA<sup>+</sup> NK cells from sorted CD8a<sup>-</sup> int-ILCs with NK cytokine mix (three to five independent experiments). Representative biaxial plots depict the phenotypes of the generated Lin<sup>-</sup>CD7<sup>+</sup> cells from sorted CD8a<sup>-</sup> int-ILCs with NK cytokine mix with irradiated OP9-DL1 or OP9 stromal cells (C), sorted CD8a<sup>+</sup> int-ILCs with NK cytokine mix (D), and sorted CD8a<sup>-</sup> int-ILCs with IL-15 (E; two independent experiments). (F–H) Purified CD8a<sup>-</sup> int-ILC (500 cells/well) were cocultured either with irradiated OP9-DL1 or with OP9 stromal cells with cytokine-free culture medium for 14 d (F) and 7 d (G and H). Generated cells were harvested and analyzed by flow cytometry (F and G). Representative biaxial plots depict the phenotypes of the generated Lin<sup>-</sup>CD7<sup>+</sup> cells (two independent experiments). (H) Quantification of the generated Lin<sup>-</sup>CD7<sup>+</sup> cells in absolute cell number (left axis) and fold change (right axis) compared with the number of initially sorted cells (two independent experiments). Error bar shows mean ± SEM. Statistical significance was determined with Student’s t test by Prism GraphPad software.

Table S1, included as an Excel file, lists the information of antibodies used in the mass cytometry data.

## Reference

van Unen, V., N. Li, I. Molendijk, M. Temurhan, T. Höllt, A.E. van der Meulen-de Jong, H.W. Verspaget, M.L. Mearin, C.J. Mulder, J. van Bergen, et al. 2016. Mass Cytometry of the Human Mucosal Immune System Identifies Tissue- and Disease-Associated Immune Subsets. *Immunity*. 44:1227–1239. <https://doi.org/10.1016/j.immuni.2016.04.014>
